# Supplementary material
Source: bioRxiv or medRxiv preprint supplement (https://www.biorxiv.org/highwire/filestream/84072/field_highwire_adjunct_files/2/270934-3.pdf)

Odds ratio

2

1

Now married

Divorced

Widowed

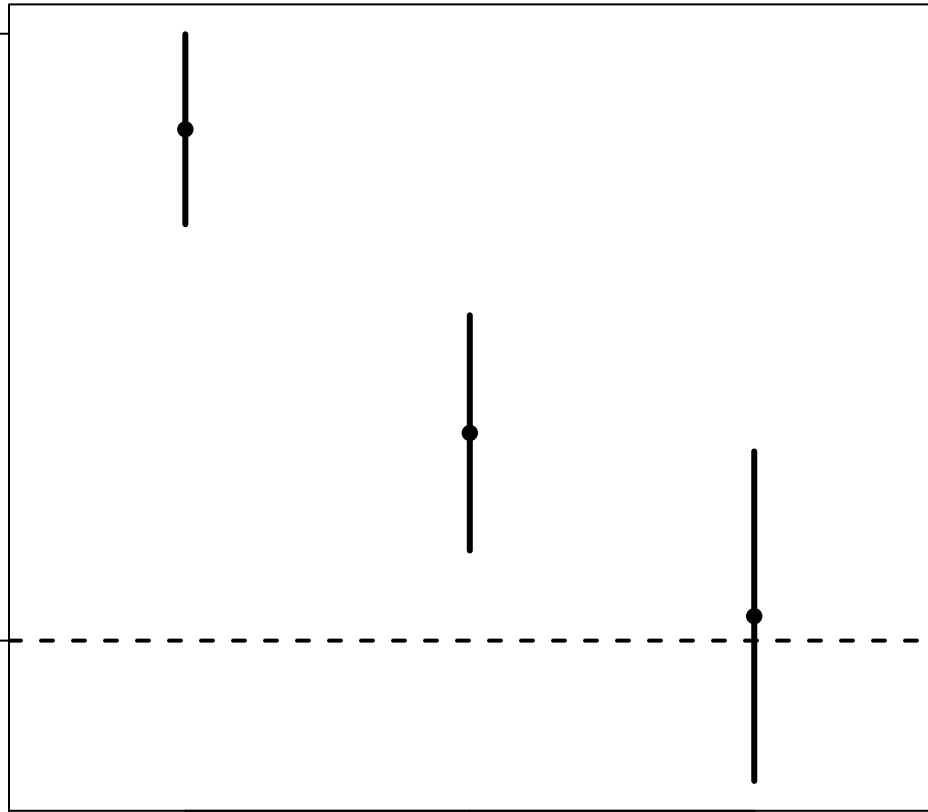

Supplement: Supplementary file [file 270934-3.pdf]
